# Supplementary material for: Role for Lipids Secreted by Irradiated Peripheral Blood Mononuclear Cells in Inflammatory Resolution in Vitro
Source: PubMed Central journal article supplement (PMC7370068; doi:10.3390/ijms21134694), 2020-06-30
Supplement: ijms-21-04694-s001.pdf [file ijms-21-04694-s001.pdf]

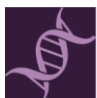

## Supplement Figures

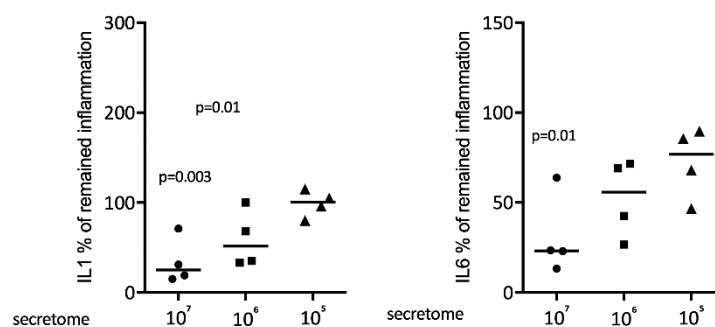

**Figure S1.** Secretome of irradiated PBMCs suppresses inflammation in primary macrophages. Murine bone marrow-derived macrophages were exposed to secretome at concentration equivalent to 10<sup>7</sup> to 10<sup>5</sup> PBMCs/ml. Inflammation was provoked by LPS 100 ng/ml. Expression of inflammatory genes is indicated in percentage (%) compared to stimulated controls (100%). Dot-blots represent independent experiments. P-values are based on an ANOVA with multiple comparison, related to secretome 10<sup>5</sup> PBMCs/ml.
